# Supplementary material for: Genome-Wide PhoB Binding and Gene Expression Profiles Reveal the Hierarchical Gene Regulatory Network of Phosphate Starvation in Escherichia coli
Source: PLoS One. 2012 Oct 5;7(10):e47314. doi: 10.1371/journal.pone.0047314 (PMC3465305; doi:10.1371/journal.pone.0047314)
Supplement: Table S3 — List of oligonucleotides used in this study. (DOC) [file pone.0047314.s008.doc]

**Table S3.** Oligonucleotides used in this study.

| PCR target | Forward and reverse primer | | | Sequence (5’-3’) |
| --- | --- | --- | --- | --- |
| (a) Primers for PhoB-3xFLAG expressing strain (MG1655_PhoB_FLAG) | | | | |
| *phoB* and pSUB11 | | *phoB*-pSUB11-F | | 5’-GACCGTGCGCGGTACAGGATATCGTTTTTCA ACCCGCTTTGACTACAAAGACCATGACGG-3’ |
| *phoB*-pSUB11-R | | 5’-ATAAGCCCTGCTCTGCGTCCGATGAGCAAGG CGTTAAAAGCATATGAATATCCTCCTTAG-3’ |
| *phoB* | | *phoB*-check1122-F | | 5’-TGCCAGTCTGAGGTGTGAAG-3’ |
| *phoB*-check1122-R | | 5’-GGCGCAATAAATTCCAGAAA-3’ |
| (b) Primers for detection of inserts of pGL3 derivatives | | | | |
| pGL3-basic vector | | pGL3_InsChk_F | | 5’-GGTACGGGAGGTACTTGGAGC-3’ |
| pGL3_InsChK_R | | 5’-GGCCTTTCTTTATGTTTTTGGC-3’ |
| (c) Primers for constructing PhoB-His fusion protein expressing vector | | | | |
| *phoB* | | PhoB_His_F | | 5’-GCCCATGGCGAGACGTATTCTGGTCG-3’ |
| PhoB_His_R | | 5’-GCAAGCTTAAAGCGGGTTGAAAAACGATATCCTG-3’ |
| (d) Primers for constructing promoter::luciferase fusionsa | | | | |
| *phoB* | | phoB_FPB | | 5’-GCGCTAGCACGGTAGTATTGAGGAACGCC-3’ |
| phoB_RPB | | 5’-GCCCATGGGATTTGCCCTGTTGTAATAAATAGG-3’ |
| *cusC* | | cusC_FPB | | 5’-GCGCTAGCCGCCAGCAGTTCAGCAAA |
| cusC_RPB | | 5’-GCCCATGGAGGCTCATAATTTCTGGTGATTTTA |
| *cusR* | | cusR_FPB | | 5’-GCGCTAGCTTAAGATTACCGCTCCAGCTGC |
| cusR_RPB | | 5’-GCCCATGGATTTCCTCCGCATGTTGCC |
| *feaR* | | feaR_FPB | | 5’-GCGCTAGCGTAGCAGAATACGTTCACGCTCTG |
| feaR_RPB | | 5’-GCCCATGGGGCACGTTTTCGCTCTGT |
| *mipA* | | mipA_FPB | | 5’-GCGCTAGCTGCAGTGTGAACTCTTCGTCCT |
| mipA_RPB | | 5’-GCCCATGGAATTAATCATTCCTTAAACAAATGTTTAG |
| *prpR* | | prpR_FPB | | 5’-GCGCTAGCTATCCGCATCCACCAGCA |
| prpR_RPB | | 5’-GCCCATGGAGCGCACCGCAAAGTTAAG |
| *sbcD* | | sbcD_FPB | | 5’-GCGCTAGCTGATATAGTCATCCGCGCCG |
| sbcD_RPB | | 5’-GCCCATGGAACGGTTCCCTGGCGAAA |
| *ydfH* | | ydfH_FPB | | 5’-GCGCTAGCCGCCGTCTTACCGGGTATG |
| ydfH_RPB | | 5’-GCCCATGGTCGTTCTTGCTTGTGAGTGAGTTAA |
| *yedX* | | yedX_FPB | | 5’-GCGCTAGCGAATTCAAAGCGTGATGTTGC |
| yedX_RPB | | 5’-GCCCATGGGTTTATATCCTTGTCATGTGAATGAGT |
| *yegH* | | yegH_FPB | | 5’-GCGCTAGCTGGTCTTTCAGGCATCCAGA |
| yegH_RPB | | 5’-GCCCATGGAGTAAGTACAAAACCTATTCGTTGTATGA |
| *yhjC* | | yhjC_FPB | | 5’-GCGCTAGCAAAGACTTAAGTAGTGGAAGGGTATTACC |
| yhjC_RPB | | 5’-GCCCATGGTTCTTTGACCGATTGTTGTTCAC |
| (e) Oligonucleotidesb for DNA binding assay | | | | |
| *mipA* | | mipA_p | | 5’-GCGTTACTGGCGAGCCTGGTCTTTACATT  AATTATGCAAAATTTATGGATGAGTTGTTGA-3’ |
| mipA_c | | 5’-TCAACAACTCATCCATAAATTTTGCATAAT  TAATGTAAAGACCAGGCTCGCCAGTAACGC-3’ |
| *yedX* | | yedX_p | | 5’-ATGTTATAGAAACAGCCTGGTTCATTACAA  AATTGTAATGCTGCTGTAAGGTTACCCTGG-3’ |
| yedX_c | | 5’-CCAGGGTAACCTTACAGCAGCATTACAAT  TTTGTAATGAACCAGGCTGTTTCTATAACAT-3’ |
| *ydfH* | | ydfH_p | | 5’-GCGTAACTGCCGGGTTATTGCTTGTCACA  AAAAAGTGGTAGACTCATGCAGTTAACTCAC-3’ |
| ydfH_c | | 5’-GTGAGTTAACTGCATGAGTCTACCACTTT  TTTGTGACAAGCAATAACCCGGCAGTTACGC-3’ |
| *cusR* | | cusR_p | | 5’-TGGCAATCGCTTATTGGCAAAATGACAAT  TTTGTCATTTTTCTGTCACCGGAAAATCAGA-3’ |
| cusR_c | | 5’-TCTGATTTTCCGGTGACAGAAAAATGACA  AAATTGTCATTTTGCCAATAAGCGATTGCCA-3’ |
| *yhjC* | | yhjC_p | | 5’-TGAGAAATCGCCACATTCGGCATGACAAC  ATTGTGAAACCCGGCATTAGATGTTAGAAAA-3’ |
| yhjC_c | | 5’-TTTTCTAACATCTAATGCCGGGTTTCACAA  TGTTGTCATGCCGAATGTGGCGATTTCTCA-3’ |
| *yegH* | | yegH_p | | 5’-CGATTTATCCATGATCGAATTGTGACATTT  GTCATACAACGAATAGGTTTTGTACTTACT-3’ |
| yegH_c | | 5’-AGTAAGTACAAAACCTATTCGTTGTATGAC  AAATGTCACAATTCGATCATGGATAAATCG-3’ |
| *feaR* | | feaR_p | | 5’-TCTGTGAAATGTATTTTTATTGTTGCATTT  GTGTTGCAATAAACGAAGCTAATGAGCCTG-3’ |
| feaR_c | | 5’-CAGGCTCATTAGCTTCGTTTATTGCAACA  CAAATGCAACAATAAAAATACATTTCACAGA-3’ |
| *prpR* | | prpR_p | | 5’-CCGAATATTGGGTTTAGTCTTGTTTCATAA  TTGTTGCAATGAAACGCGGTGAAACATTGC-3’ |
| prpR_c | | 5’-GCAATGTTTCACCGCGTTTCATTGCAACA  ATTATGAAACAAGACTAAACCCAATATTCGG-3’ |
| *yahA* | | yahA_p | | 5’-TATCCGCCACGGGGAGTAATAGTCACAGA  TATATTAATGATAATCACTATCACCATATCG-3’ |
| yahA_c | | 5’-CGATATGGTGATAGTGATTATCATTAATATA  TCTGTGACTATTACTCCCCGTGGCGGATA-3’ |
| *cof* | | cof_p | | 5’-GTTTTCGTTATCAGATAATCGATGTCAAAA  AAATGCCACTCGGCAGCGTCACCAAGATCT-3’ |
| cof_c | | 5’-AGATCTTGGTGACGCTGCCGAGTGGCATT  TTTTTGACATCGATTATCTGATAACGAAAAC-3’ |
| *yddV* | | yddV_p | | 5’-TTGCGATACGGTATTTCTTATCTGTAATAAA  AATTTCACCCGCAGACTTCTGTTATTCAA-3’ |
| yddV_c | | 5’-TTGAATAACAGAAGTCTGCGGGTGAAATT  TTTATTACAGATAAGAAATACCGTATCGCAA-3’ |
|  | |  |  | |

aFor the construction of pGL3 derivative plasmids, the upstream region was around 500 bps in front of the translation start site of each gene.

bFor each binding candidate, complimentary oligonucleotide of 60 base pairs centered at the corresponding putative binding site were first end-labeled with biotin separately and then annealed before use.
